# Supplementary figures and images for: Low-dose chemotherapeutic drugs induce reactive oxygen species and initiate apoptosis-mediated genomic instability
Source: Royal Society of Chemistry journal article supplement (doi:10.1039/c5tx00391a), 2016-01-01

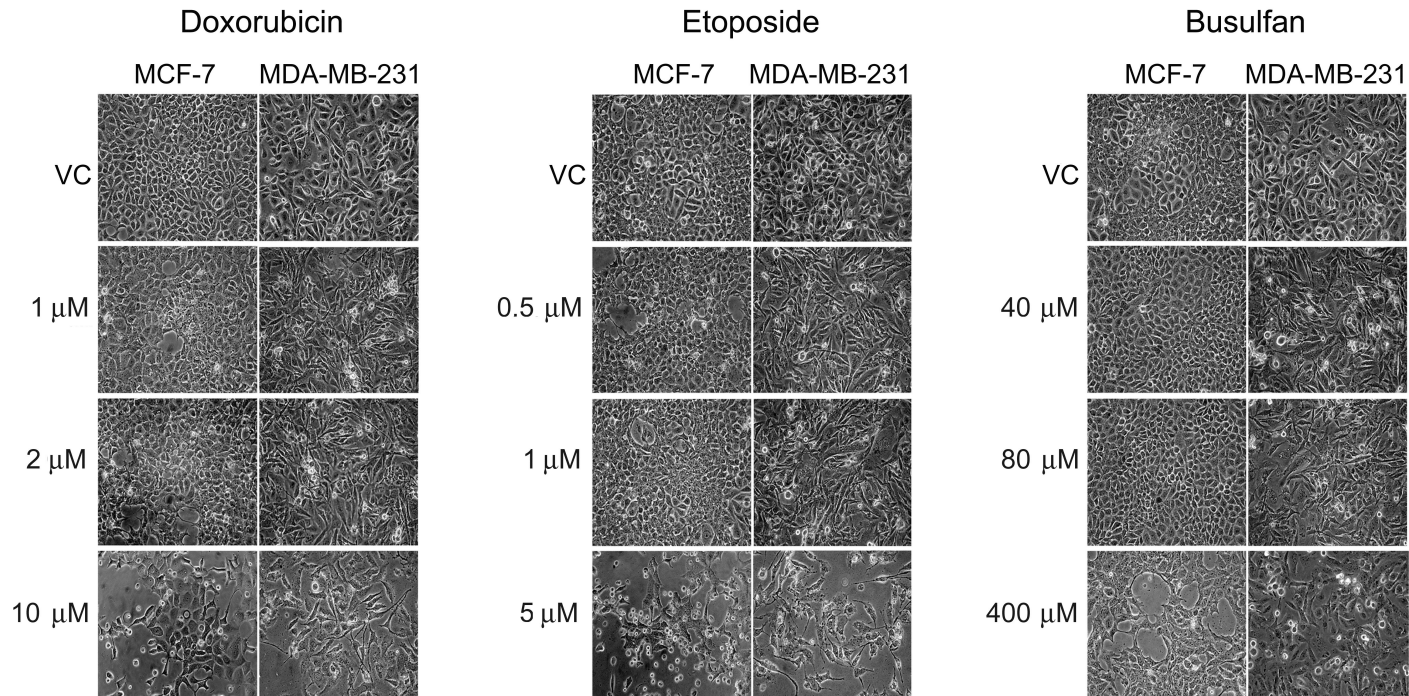

Supplement: c5tx00391a2.pdf [file c5tx00391a2.pdf]
